# Supplementary material
Source: PubMed Central journal article supplement (PMC4859642)
Supplement: ajtr0008-1581-f5.pdf [file ajtr0008-1581-f5.pdf]

## Barcoded sequencing reveals diverse intrauterine microbiomes

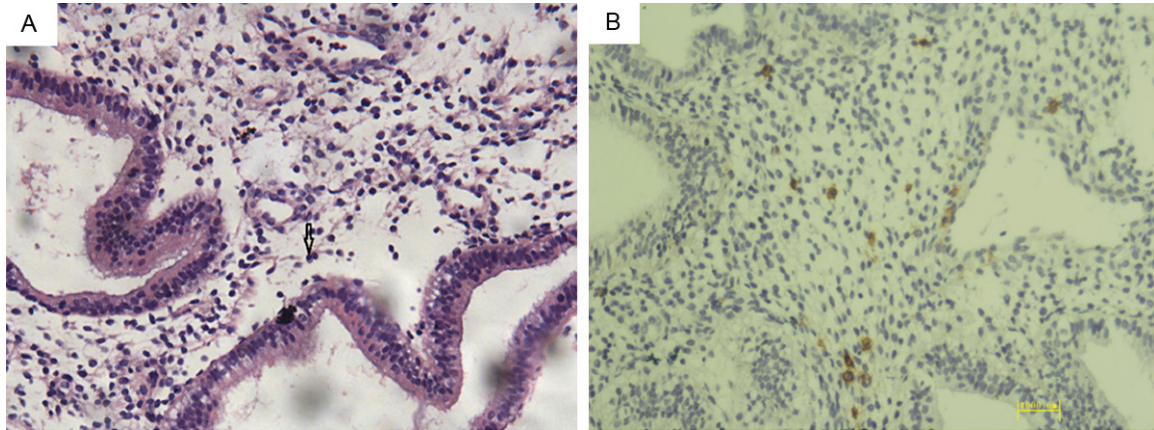

**Figure S1.** Highlighted plasma cell based on immunohistochemical staining. A. A fragment of the endometrial curet-tage specimen stained by Hematoxylin and eosin (a,  $\times 200$ ) in which the specific cell (plasma cell, open arrow) can't be clearly recognized; B. The plasma cell syndecan-1 immunoreactivity is evident on the cell surface (syndecann-1,  $\times 200$ ) in a case of chronic endometritis.

**Table S1.** Number of quality sequences in 60 samples from vagina and intrauterine cavities of three groups

| Group       | Sampling site         | Samples | Barcode sequences | Number of quality sequences |
|-------------|-----------------------|---------|-------------------|-----------------------------|
| Group H     | Vagina                | 7V      | ACACATGTCTAC      | 8310                        |
|             |                       | 8V      | ACGCAACTGCTA      | 14162                       |
|             |                       | 9V      | AGCGTAGGTCGT      | 38817                       |
|             |                       | 10V     | ACATGTCACGTG      | 29729                       |
|             |                       | 41V     | ATACTATTGCGC      | 4810                        |
|             |                       | 48V     | ATCGCTCGAGGA      | 7577                        |
|             |                       | 50V     | ATTCTGTGAGCG      | 8260                        |
|             |                       | 57V     | AGTGGATGCTCT      | 8763                        |
|             |                       | 60V     | ATCGTACAACCTC     | 13147                       |
|             |                       | 64V     | ACGTTAGCACAC      | 6100                        |
|             | Intrauterine cavities | 7I      | ACATGATCGTTC      | 6699                        |
|             |                       | 8I      | ACTGTCTGAAGCT     | 6600                        |
|             |                       | 9I      | ACACGAGCCACA      | 11649                       |
|             |                       | 10I     | ACGCGATACTGG      | 4912                        |
|             |                       | 41I     | ATGCACTGGCGA      | 6146                        |
|             |                       | 48I     | ATGCAGCTCAGT      | 5228                        |
|             |                       | 50I     | CACGGACTATAC      | 5203                        |
|             |                       | 57I     | ATAGCTCCATAC      | 11683                       |
|             |                       | 60I     | CAACACGCACGA      | 18762                       |
|             |                       | 64I     | ACTGTACGCGTA      | 9814                        |
| Group EP/CE | Vagina                | 22V     | ACCGCAGAGTCA      | 12070                       |
|             |                       | 23V     | ACTCGATTCGAT      | 11828                       |
|             |                       | 25V     | AGATCTCTGCAT      | 10068                       |
|             |                       | 36V     | AGAGAGCAAGTG      | 11905                       |
|             |                       | 39V     | AGGCTACACGAC      | 7646                        |
|             |                       | 49V     | AATCAGTCTCGT      | 7950                        |
|             |                       | 55V     | AATCGTGACTCG      | 11148                       |
|             |                       | 65V     | CACGTCGATGGA      | 11069                       |
|             |                       | 67V     | ATAGGCGATCTC      | 7183                        |
|             |                       | 68V     | AGATACACGCGC      | 8438                        |

## Barcoded sequencing reveals diverse intrauterine microbiomes

|             |                       |              |                |       |
|-------------|-----------------------|--------------|----------------|-------|
| Group EP/CE | Intrauterine cavities | 22I          | ACGGTGAGTGTC   | 4978  |
|             |                       | 23I          | AGACTGCGTACT   | 11874 |
|             |                       | 25I          | AGCTATCCACGA   | 5059  |
|             |                       | 36I          | AGCATATGAGAG   | 7220  |
|             |                       | 39I          | AAGCTGCAGTCG   | 7222  |
|             |                       | 49I          | ACGACGTCTTAG   | 8413  |
|             |                       | 55I          | ACGAGTGCTATC   | 4881  |
|             |                       | 65I          | CAGCACTAAGCG   | 8487  |
|             |                       | 67I          | ATCTACTACACG   | 4238  |
|             |                       | 68I          | AGCGCTGATGTG   | 11962 |
| Group EP    | Vagina                | 20V          | ACCAGCGACTAG   | 9822  |
|             |                       | 21V          | AGCTTGACAGCT   | 17823 |
|             |                       | 24V          | AGCAGTCGCGAT   | 10470 |
|             |                       | 26V          | AAGAGATGTCGA   | 20819 |
|             |                       | 27V          | ACGTA CT CAGTG | 3159  |
|             |                       | 40V          | ACAGCTAGCTTG   | 5632  |
|             |                       | 44V          | ACGTCTGTAGCA   | 4156  |
|             |                       | 46V          | AGCCATACTGAC   | 12719 |
|             |                       | 52V          | ACGTGAGAGAAT   | 3216  |
|             |                       | 61V          | AGCGAGCTATCT   | 12102 |
|             | Intrauterine cavities | 20I          | ACGGATCGTCAG   | 4794  |
|             |                       | 21I          | AACTGTGCGTAC   | 7113  |
|             |                       | 24I          | AGGACGCACTGT   | 15654 |
|             |                       | 26I          | ACAGCAGTGGTC   | 8018  |
|             |                       | 27I          | ACTCGCACAGGA   | 4912  |
|             |                       | 40I          | ACCTGTCTCTCT   | 3702  |
|             |                       | 44I          | AGAGCAAGAGCA   | 7070  |
|             |                       | 46I          | AGGTGTGATCGC   | 9370  |
|             | 52I                   | ACTGACAGCCAT | 9488           |       |
|             | 61I                   | AGTACTGCAGGC | 8446           |       |

**Table S2.** The mean relative abundance of the genus (>0.1%) in the samples of in the six groups

| Genus                    | Group H (V) | Group H (I) | Group EP/CE (V) | Group EP/CE (I) | Group EP (V) | Group EP (I) |
|--------------------------|-------------|-------------|-----------------|-----------------|--------------|--------------|
| <i>Lactobacillus</i>     | 60.93%      | 6.23%       | 56.83%          | 33.44%          | 47.48%       | 38.86%       |
| <i>Enterobacter</i>      | 3.27%       | 33.41%      | 1.08%           | 7.23%           | 4.47%        | 8.40%        |
| <i>Pseudomonas</i>       | 2.44%       | 23.56%      | 0.92%           | 7.39%           | 1.78%        | 7.06%        |
| <i>Gardnerella</i>       | 15.30%      | 3.55%       | 23.42%          | 6.95%           | 16.93%       | 5.54%        |
| <i>Streptococcus</i>     | 1.32%       | 0.59%       | 3.08%           | 1.06%           | 14.55%       | 2.63%        |
| <i>Prevotella</i>        | 6.28%       | 0.83%       | 2.64%           | 1.31%           | 0.86%        | 1.27%        |
| <i>Bifidobacterium</i>   | 0.97%       | 0.58%       | 5.74%           | 1.46%           | 1.01%        | 4.82%        |
| <i>Desulfosporosinus</i> | 0.40%       | 4.33%       | 0.41%           | 5.45%           | 0.61%        | 4.28%        |
| <i>Ralstonia</i>         | 0.12%       | 4.26%       | 0.09%           | 2.67%           | 0.13%        | 1.57%        |
| <i>Veillonella</i>       | 0.34%       | 0.21%       | 0.19%           | 0.33%           | 3.83%        | 0.46%        |
| <i>Atopobium</i>         | 1.81%       | 0.58%       | 0.46%           | 0.42%           | 0.57%        | 0.44%        |
| <i>Thalassospira</i>     | 0.06%       | 0.79%       | 0.05%           | 1.69%           | 0.07%        | 1.23%        |
| <i>Alteromonas</i>       | 0.07%       | 0.45%       | 0.06%           | 1.44%           | 0.06%        | 1.09%        |
| <i>Megasphaera</i>       | 1.20%       | 0.52%       | 0.08%           | 0.13%           | 0.12%        | 0.13%        |
| <i>Vibrio</i>            | 0.05%       | 0.74%       | 0.04%           | 1.16%           | 0.06%        | 0.73%        |
| <i>Cupriavidus</i>       | 0.02%       | 0.92%       | 0.02%           | 0.61%           | 0.03%        | 0.44%        |

## Barcoded sequencing reveals diverse intrauterine microbiomes

|                          |       |       |       |       |       |       |
|--------------------------|-------|-------|-------|-------|-------|-------|
| <i>Actinomyces</i>       | 0.04% | 0.03% | 0.05% | 0.06% | 0.87% | 0.06% |
| <i>Acinetobacter</i>     | 0.01% | 0.10% | 0.02% | 0.77% | 0.03% | 0.14% |
| <i>Sphingomonas</i>      | 0.03% | 0.77% | 0.04% | 0.66% | 0.04% | 0.39% |
| <i>Ureaplasma</i>        | 0.05% | 0.03% | 0.16% | 0.07% | 0.72% | 0.14% |
| <i>Marinobacter</i>      | 0.03% | 0.24% | 0.02% | 0.56% | 0.04% | 0.40% |
| <i>Sneathia</i>          | 0.55% | 0.13% | 0.03% | 0.04% | 0.01% | 0.03% |
| <i>Klebsiella</i>        | 0.09% | 0.53% | 0.04% | 0.17% | 0.10% | 0.18% |
| <i>Pelomonas</i>         | 0.02% | 0.51% | 0.02% | 0.46% | 0.02% | 0.21% |
| <i>Muricauda</i>         | 0.01% | 0.19% | 0.01% | 0.47% | 0.01% | 0.23% |
| <i>Corynebacterium</i>   | 0.06% | 0.06% | 0.45% | 0.23% | 0.22% | 0.32% |
| <i>Stenotrophomonas</i>  | 0.00% | 0.02% | 0.01% | 0.44% | 0.01% | 0.02% |
| <i>Erythrobacter</i>     | 0.01% | 0.22% | 0.02% | 0.39% | 0.01% | 0.33% |
| <i>Dialister</i>         | 0.38% | 0.14% | 0.06% | 0.09% | 0.14% | 0.09% |
| <i>Escherichia</i>       | 0.03% | 0.18% | 0.03% | 0.27% | 0.06% | 0.37% |
| <i>Bacillus</i>          | 0.02% | 0.17% | 0.02% | 0.36% | 0.02% | 0.20% |
| <i>Staphylococcus</i>    | 0.03% | 0.03% | 0.03% | 0.21% | 0.32% | 0.08% |
| <i>Mobiluncus</i>        | 0.32% | 0.16% | 0.10% | 0.07% | 0.06% | 0.06% |
| <i>Singulisphaera</i>    | 0.01% | 0.16% | 0.01% | 0.25% | 0.01% | 0.31% |
| <i>Halomonas</i>         | 0.01% | 0.11% | 0.01% | 0.30% | 0.01% | 0.21% |
| <i>Methylobacterium</i>  | 0.02% | 0.19% | 0.01% | 0.29% | 0.01% | 0.13% |
| <i>Loktanella</i>        | 0.01% | 0.09% | 0.01% | 0.25% | 0.01% | 0.19% |
| <i>Gramella</i>          | 0.01% | 0.07% | 0.00% | 0.21% | 0.01% | 0.15% |
| <i>Fusobacterium</i>     | 0.00% | 0.02% | 0.04% | 0.04% | 0.02% | 0.20% |
| <i>Anaerococcus</i>      | 0.03% | 0.04% | 0.20% | 0.18% | 0.15% | 0.13% |
| <i>Thermus</i>           | 0.00% | 0.04% | 0.00% | 0.19% | 0.00% | 0.05% |
| <i>Porphyromonas</i>     | 0.03% | 0.02% | 0.08% | 0.19% | 0.01% | 0.07% |
| <i>Azorhizophilus</i>    | 0.18% | 0.04% | 0.14% | 0.14% | 0.14% | 0.10% |
| <i>Aquabacterium</i>     | 0.01% | 0.10% | 0.01% | 0.17% | 0.02% | 0.07% |
| <i>Enhydrobacter</i>     | 0.00% | 0.06% | 0.00% | 0.16% | 0.00% | 0.05% |
| <i>Opitutus</i>          | 0.01% | 0.07% | 0.01% | 0.16% | 0.01% | 0.09% |
| <i>Tolumonas</i>         | 0.03% | 0.15% | 0.02% | 0.07% | 0.04% | 0.06% |
| <i>Blastopirellula</i>   | 0.01% | 0.06% | 0.01% | 0.15% | 0.01% | 0.12% |
| <i>Campylobacter</i>     | 0.02% | 0.01% | 0.08% | 0.14% | 0.02% | 0.02% |
| <i>Gemmata</i>           | 0.01% | 0.11% | 0.01% | 0.14% | 0.01% | 0.13% |
| <i>Ktedonobacter</i>     | 0.01% | 0.07% | 0.00% | 0.12% | 0.01% | 0.14% |
| <i>Thiothrix</i>         | 0.08% | 0.14% | 0.05% | 0.12% | 0.08% | 0.09% |
| <i>Planctomyces</i>      | 0.02% | 0.03% | 0.02% | 0.13% | 0.03% | 0.13% |
| <i>Bacteroides</i>       | 0.00% | 0.01% | 0.02% | 0.03% | 0.00% | 0.13% |
| <i>Pseudoalteromonas</i> | 0.00% | 0.05% | 0.00% | 0.13% | 0.00% | 0.09% |
| <i>Howardella</i>        | 0.02% | 0.00% | 0.02% | 0.01% | 0.13% | 0.01% |
| <i>Simkania</i>          | 0.00% | 0.10% | 0.00% | 0.12% | 0.00% | 0.05% |
| <i>Anaeroglobus</i>      | 0.01% | 0.02% | 0.02% | 0.04% | 0.03% | 0.12% |
| <i>Thermogymnomonas</i>  | 0.00% | 0.06% | 0.00% | 0.12% | 0.00% | 0.05% |
| <i>Methylophaga</i>      | 0.00% | 0.05% | 0.01% | 0.11% | 0.00% | 0.07% |
| <i>Dechloromonas</i>     | 0.01% | 0.08% | 0.01% | 0.11% | 0.01% | 0.06% |
| <i>Finegoldia</i>        | 0.06% | 0.06% | 0.07% | 0.07% | 0.11% | 0.08% |
| <i>Peptoniphilus</i>     | 0.08% | 0.04% | 0.10% | 0.11% | 0.07% | 0.08% |
| <i>Deinococcus</i>       | 0.00% | 0.05% | 0.00% | 0.11% | 0.00% | 0.06% |
| <i>Kangiella</i>         | 0.01% | 0.02% | 0.01% | 0.11% | 0.00% | 0.08% |

Notes: The relative abundance of genus were calculated as the average value of samples in the same group.

## Barcoded sequencing reveals diverse intrauterine microbiomes

**Table S3.** Microbial biodiversity of the six sample groups revealed by Miseq sequencing

| Group           | OTUs | Chao1 | Shannon | Simpson |
|-----------------|------|-------|---------|---------|
| Group H (V)     | 176  | 514   | 2.78    | 0.61    |
| Group EP/CE (V) | 178  | 526   | 2.66    | 0.60    |
| Group EP (V)    | 186  | 549   | 2.78    | 0.60    |
| Group H (I)     | 331  | 789   | 4.07    | 0.77    |
| Group EP/CE (I) | 501  | 1112  | 5.66    | 0.93    |
| Group EP (I)    | 454  | 1036  | 5.19    | 0.88    |

Notes: OTUs were defined at 97% sequence identity level. For each sample, 3000 sequences were randomly selected to calculate the number of the OTUs, chao1, Shannon index and simpson index, the average values of the same group were then calculated to represent the value of the corresponding group.
